# Supplementary material for: Soluble PD-L1 as a Prognostic Factor for Immunotherapy Treatment in Solid Tumors: Systematic Review and Meta-Analysis
Source: MDPI journal article supplement (doi:10.3390/ijms232214496), 2022-11-21
Supplement: s1 [file s1]

Table S1: Information on survival (OS and PFS) data

| ID | Authors & Pub Year            | N. Pts | 1y-OS low | 1y-OS high | 2y-OS low | 2y-OS high | 1y-PFS low | 1y-PFS high | 2y-PFS low | 2y-PFS high |
|----|-------------------------------|--------|-----------|------------|-----------|------------|------------|-------------|------------|-------------|
| 1  | Zizzari et al. 2020           | 22     | NA        | NA         | NA        | NA         | 50         | 18.18182    | 40         | 0           |
| 2  | D. Machiraju et al. 2021      | 113    | NA        | NA         | NA        | NA         | NA         | NA          | NA         | NA          |
| 3  | Incorvaia L.2020              | 21     | NA        | NA         | NA        | NA         | 25         | 100         | 0          | 11.1        |
| 4  | Chiarucci C. 2020             | 40     | 66.7      | 47.7       | 38.1      | 26         | NA         | NA          | NA         | NA          |
| 5  | Costantini A. et al 2018      | 43     | 62.2      | 41         | NA        | NA         | 43.7       | 21.7        | NA         | NA          |
| 6  | Zamora Atenza et al. 2022     | 119    | 56        | 55         | 41.7      | 28         | 37.6       | 33          | 31         | 21.2        |
| 7  | So Yeon Oh et al.2021         | 128    | 59.7      | 14         | 19.6      | 0          | 24.8       | 0           | 12.4       | 0           |
| 8  | Manuela Tiako Meyo et al 2020 | 51     | NA        | NA         | NA        | NA         | NA         | NA          | NA         | NA          |
| 9  | Yusuke Okuma et al. 2018      | 39     | 69.7      | 33.4       | NA        | NA         | 45.9       | 20          | NA         | NA          |
| 10 | Mahoney KM, et al. 2022       | 169    | NA        | NA         | NA        | NA         | NA         | NA          | NA         | NA          |
| 11 | Murakami S. 2020              | 233    | 65.4      | 34.3       | 54        | 30         | 34.2       | 27.4        | 27.6       | 21.6        |
| 12 | Mazzaschi G 2020              | 109    | 55.6      | 19         | 36.8      | 0          | 46.8       | 0           | 36.4       | 0           |
|    | Mean                          |        | 62.2      | 34.9       | 38.0      | 16.8       | 38.5       | 27.5        | 24.6       | 9.0         |
|    | Min                           |        | 55.6      | 14         | 19.6      | 0          | 24.8       | 0           | 0          | 0           |
|    | Max                           |        | 69.7      | 55         | 54        | 30         | 50         | 100         | 40         | 21.6        |

Table S2: input data

| ID | Authors & Pub Year            | tumor type       | hr.mean | hr.lower | hr.upper | end-point | Pts | cut-off PD-L1 (np/mL) |
|----|-------------------------------|------------------|---------|----------|----------|-----------|-----|-----------------------|
| 10 | Mahoney KM, et al. 2022       | Melanoma         | 1.12    | 0.83     | 1.52     | OS        | 78  | 2312                  |
| 4  | Chiarucci C. 2020             | Mesothelioma     | 1.78    | 0.92     | 3.55     | OS        | 40  | 70                    |
| 5  | Costantini A. et al 2018      | NSCLC            | 2.74    | 0.86     | 6.64     | OS        | 33  | 33.97                 |
| 6  | Zamora Atenza et al. 2022     | NSCLC            | 1       | 0.96     | 1.05     | OS        | 118 | 12.94                 |
| 9  | Yusuke Okuma et al. 2018      | NSCLC            | 2.87    | 1.11     | 8.57     | OS        | 39  | 3357                  |
| 7  | So Yeon Oh et al.2021         | Mixed population | 1.788   | 1.207    | 2.65     | OS        | 17  | 11000                 |
| 10 | Mahoney KM, et al. 2022       | RCC              | 1.02    | 0.7      | 1.48     | OS        | 91  | 1978                  |
| 11 | Mazzaschi G. et al 2020       | NSLCC            | 2.53    | 1.42     | 4.51     | OS        | 109 | 113                   |
| 12 | Murakami S. 2020              | NSLCC            | 1.677   | 1.12     | 2.51     | OS        | 233 | 90                    |
| 2  | D. Machiraju et al. 2021      | Melanoma         | 1.81    | 0.88     | 4.63     | PFS       | 113 | 133                   |
| 10 | Mahoney KM, et al. 2022       | Melanoma         | 0.95    | 0.71     | 1.26     | PFS       | 78  | 2312                  |
| 1  | Zizzari et al. 2020           | NSCLC            | 2.85    | 1.35     | 10.37    | PFS       | 22  | 20                    |
| 5  | Costantini A. et al 2018      | NSCLC            | 2.63    | 1.03     | 5.52     | PFS       | 33  | 33.97                 |
| 6  | Zamora Atenza et al. 2022     | NSCLC            | 0.98    | 0.94     | 1.03     | PFS       | 114 | 12.94                 |
| 8  | Manuela Tiako Meyo et al 2020 | NSCLC            | 2.68    | 1.36     | 5.28     | PFS       | 51  | 156                   |
| 9  | Yusuke Okuma et al. 2018      | NSCLC            | 2.33    | 1.09     | 6.31     | PFS       | 39  | 3357                  |
| 7  | So Yeon Oh et al.2021         | Mixed population | 1.928   | 1.038    | 3.581    | PFS       | 17  | 11000                 |
| 3  | Incorvaia L.2020              | RCC              | 0.24    | 0.02     | 0.23     | PFS       | 21  | 660                   |
| 10 | Mahoney KM, et al. 2022       | RCC              | 1.14    | 0.87     | 1.49     | PFS       | 91  | 1978                  |
| 11 | Mazzaschi G. et al 2020       | NSLCC            | 2.55    | 1.5      | 4.32     | PFS       | 109 | 113                   |
| 12 | Murakami S. 2020              | NSLCC            | 2.66    | 1.67     | 4.25     | PFS       | 233 | 90                    |
